# Supplementary material for: Controlled Fabrication of Hierarchically Structured MnO2@NiCo-LDH Nanoarrays for Efficient Electrocatalytic Urea Oxidization
Source: Preprints.org preprint supplement (doi:10.20944/preprints202307.0073.v1), 2023-07-04
Supplement: Supplementary file 1 [file supplementary]

*Supplementary data for*

Controlled Fabrication of Hierarchically Structured MnO2@NiCo-LDH Nanoarrays for Efficient Electrocatalytic Urea Oxidization

Wenjun Liu a, Wenbo Xu a, Guofa Dong b,*, Ming Fang a,*

1. Shenzhen Key Laboratory of Special Functional Materials, Guangdong Research Centre for Interfacial Engineering of Functional Materials, College of Materials Science and Engineering, Shenzhen University, Shenzhen 518060, China.
2. Fujian Key Laboratory of Functional Marine Sensing Materials, College of Materials and Chemical Engineering, Minjiang University, Fuzhou 350108, China

*E-mail: [gfdong@mju.edu.cn](mailto:gfdong@mju.edu.cn); [m.fang@szu.edu.cn](mailto:m.fang@szu.edu.cn)


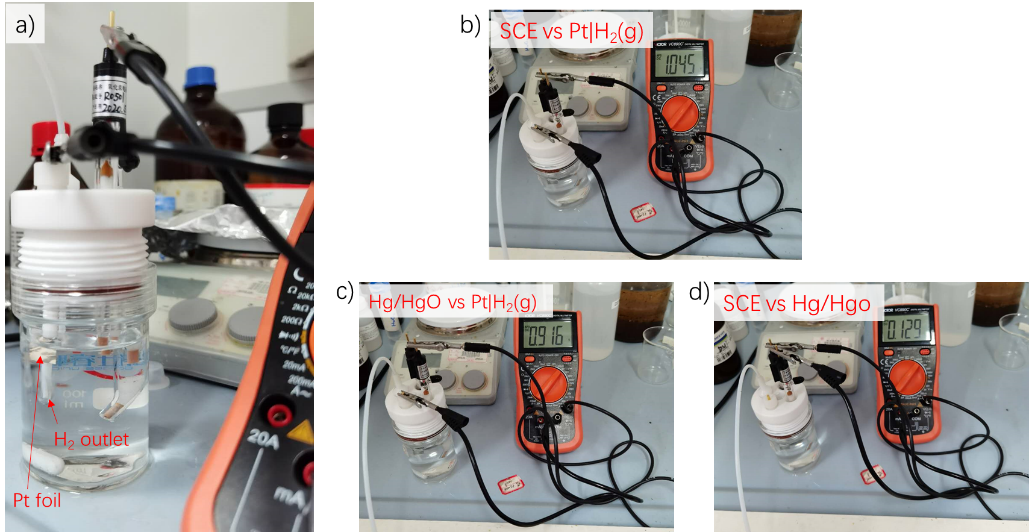


**Figure S1**. Potential calibration of the SCE and Hg/HgO against a Pt|H2(g) electrode in 1 M KOH. Note: H2 gas was bubbled against a fresh polished platinum foil for at least 30 min, and the voltage measurements were conducted immediately after shutting off the gas to avoid any mechanical disturbance by the gas bubbling.


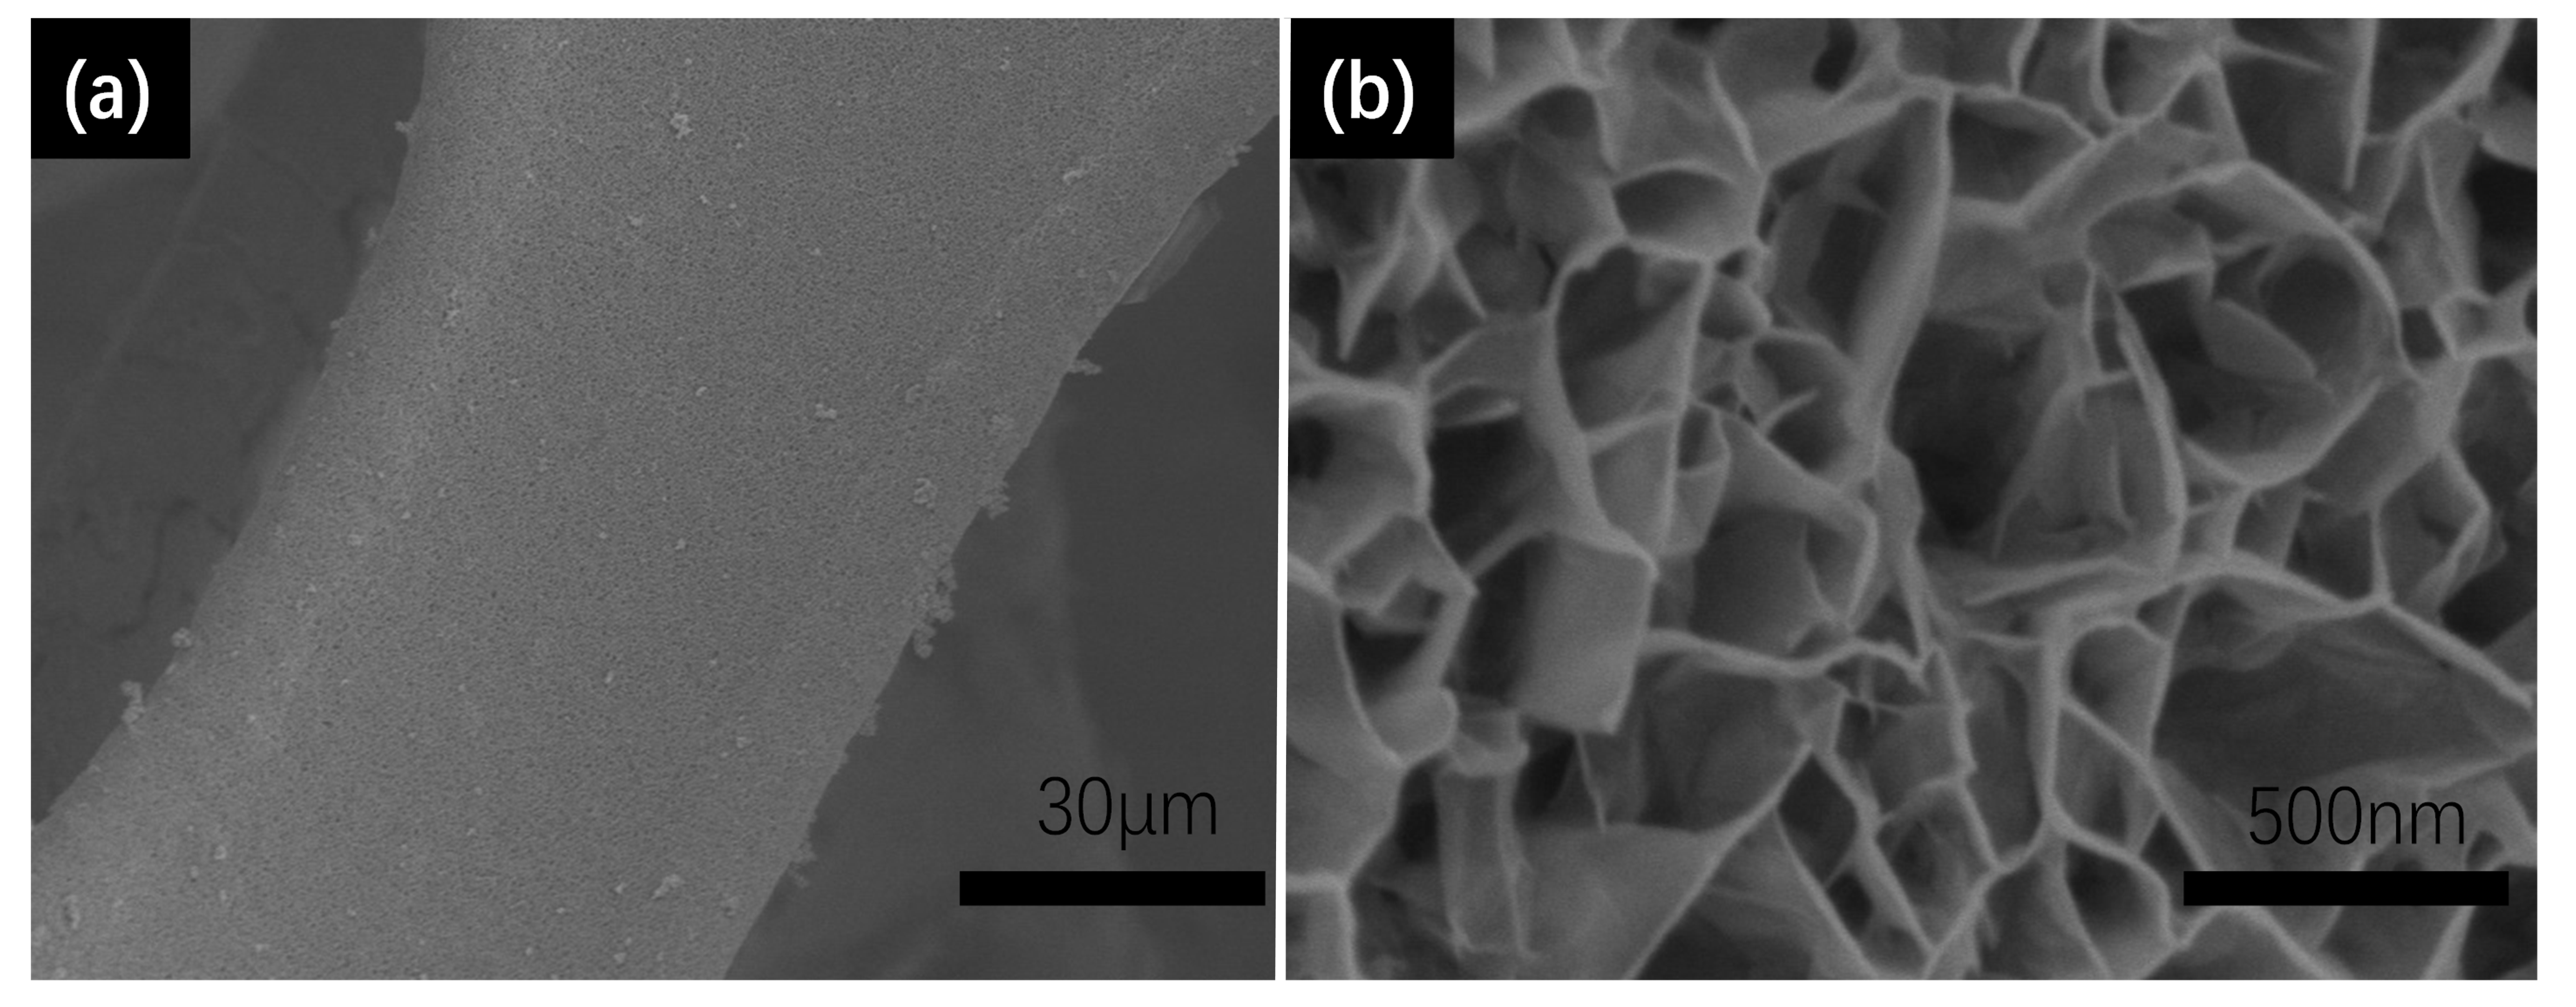


**Figure S2**. SEM images of MnO2 nanosheet arrays grown on nickel foam (NF).


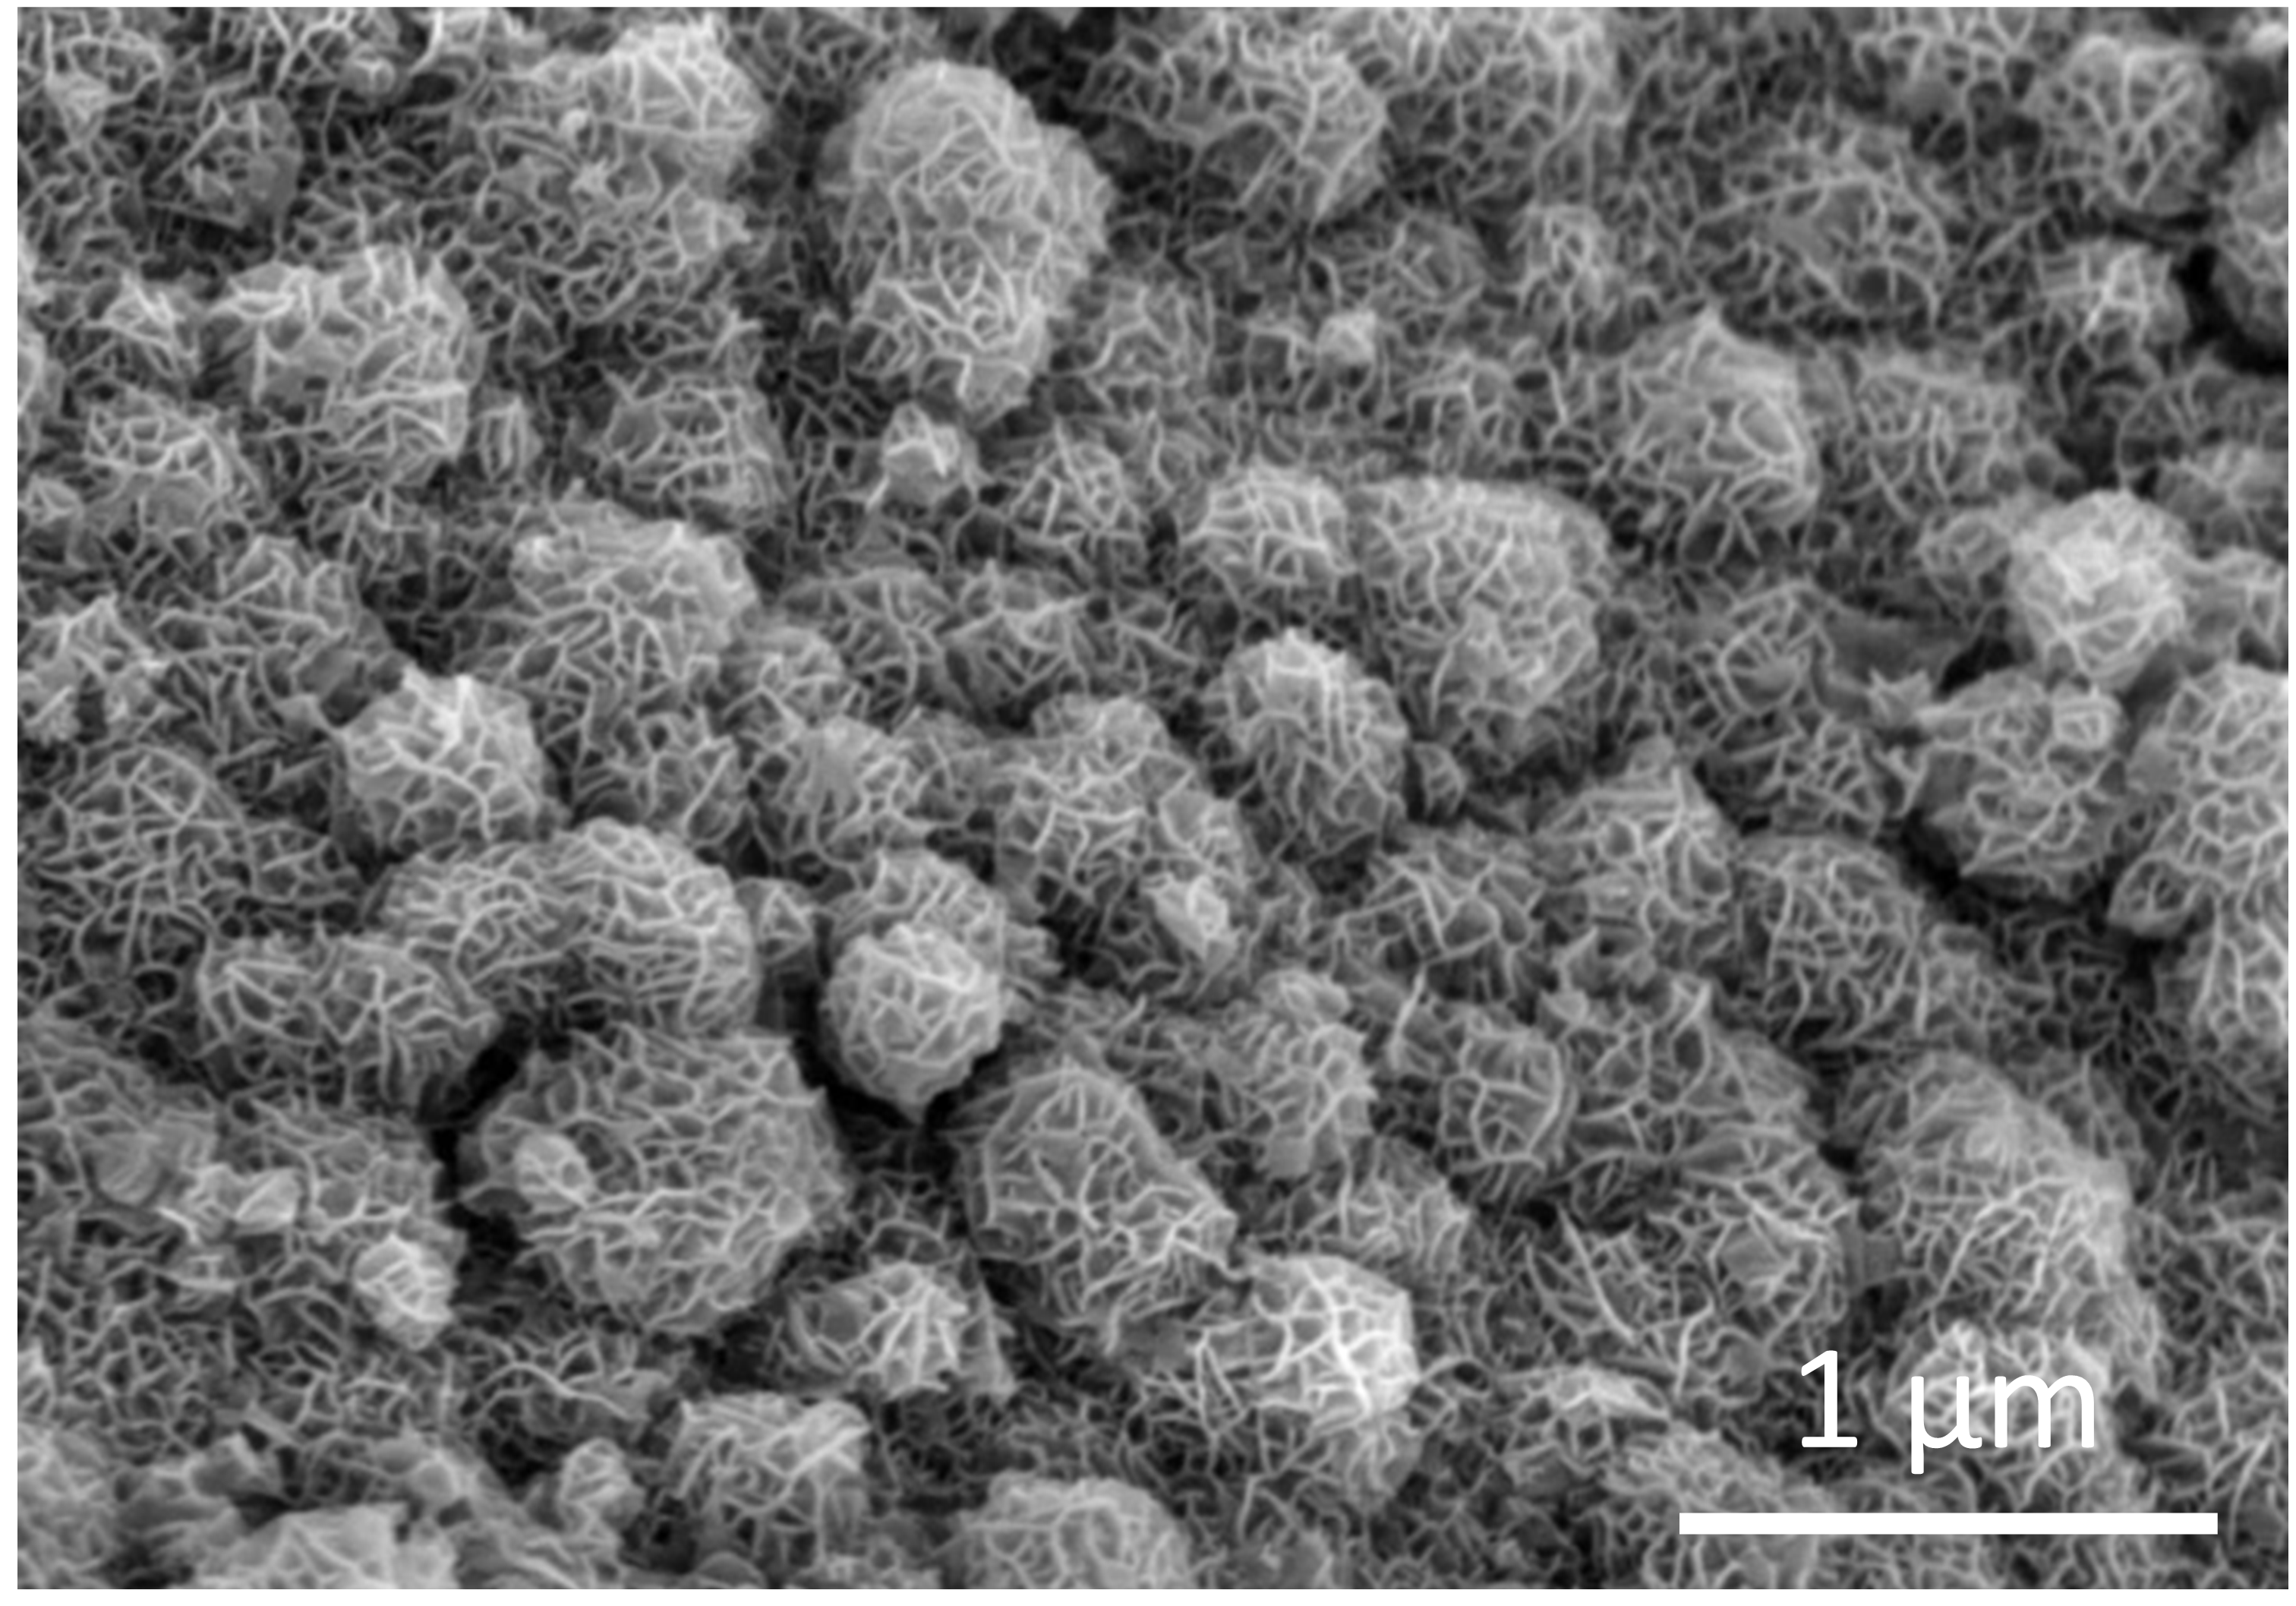


**Figure S3**. SEM image of CoNi-LDH deposited on NF.


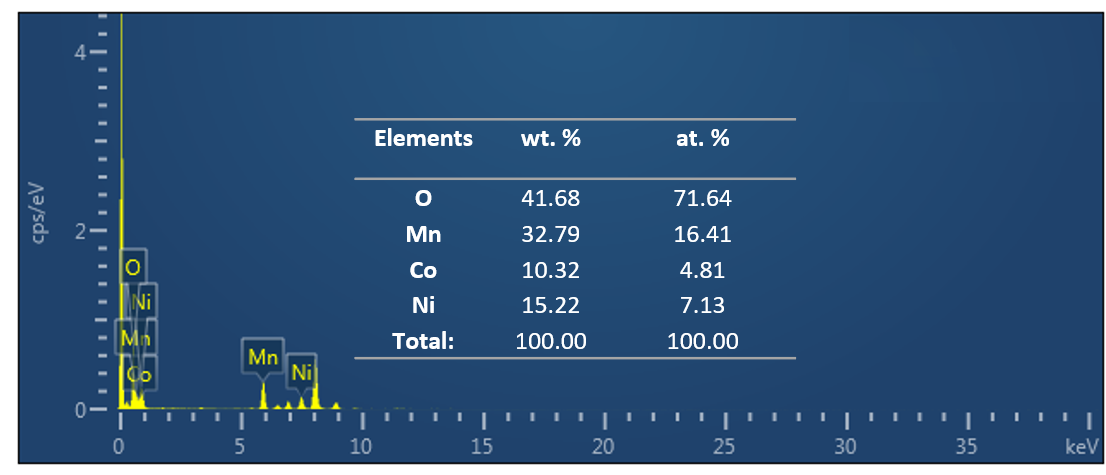


**Figure S4**. EDS spectrum of the mapping area.

**Figure S5**. Enlarged view of the UOR LSV curves of different catalysts.


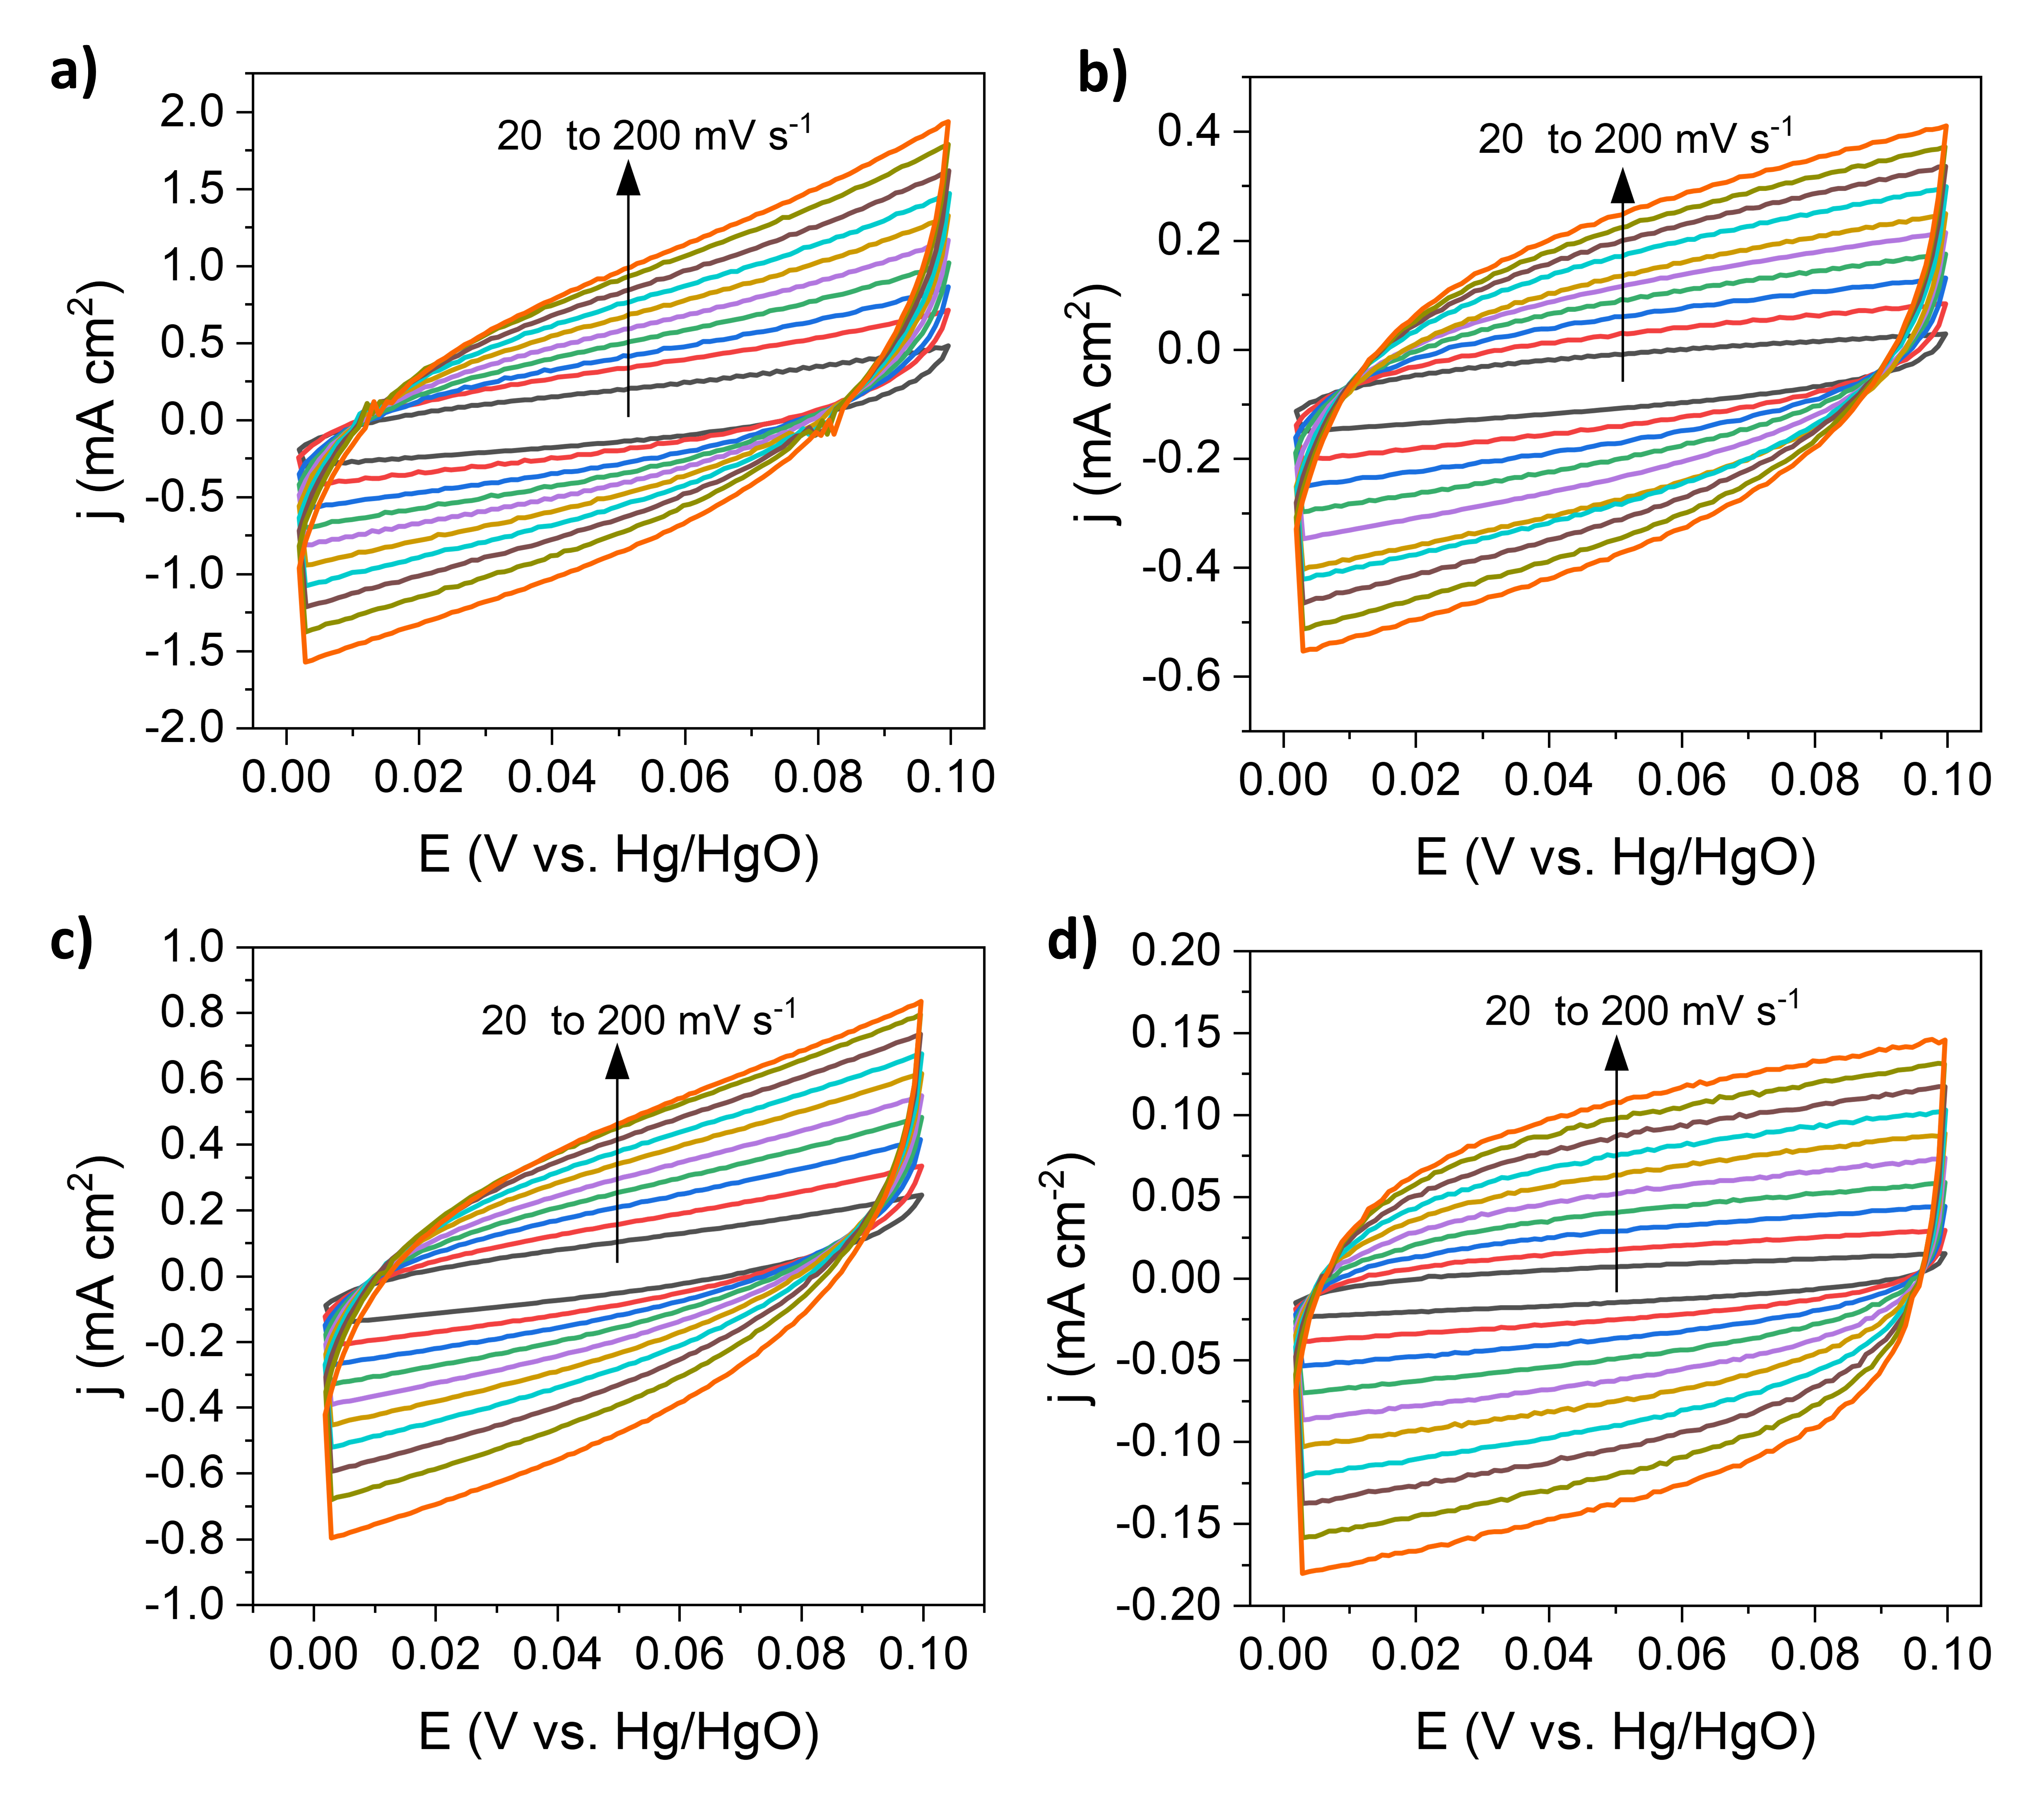


**Figure S6**. CV curves of a) MnO2@NiCo-LDH, b) NiCo-LDH/NF, c) MnO2/NF, and d) NF at different potential scan rates in the non-Faradaic potential range.

**Figure S7**. LSV curves of UOR determined on various MnO2@NiCo-LDH samples with different deposition time.

**Table S1**.Performance comparison of UOR catalysts reported recently.

| Catalysts | Electrolyte | *j* (mA cm-2) | | | Potential (V) | Reference |
| --- | --- | --- | --- | --- | --- | --- |
| CoS2-MoS2 | 1.0 M KOH  0.5 M urea | | 10 | 1.29 | | Adv. Energy Mater., 2018, 1801775 | |
| Ni3N/NF | 1.0 M KOH  0.5 M urea | | 100 | 1.42 | | ACS Appl. Mater. Interfaces, 2019, 11, 13168 | |
| Mo-Co-S-Se/CC | 1.0 M KOH  0.5 M urea | | 10 | 1.40 | | ACS Sustainable Chem. Eng., 2019, 7, 16577 | |
| NiMoO3S/NF | 1.0 M KOH  0.5 M urea | | 10 | 1.34 | | Chem. Commun., 2020, 56, 11038 | |
| NiSe2-NiO 350 | 1.0 M KOH  0.33 M urea | | 10 | 1.33 | | Appl. Catal. B Environ., 2020, 276,119165 | |
| CoFeCr LDH/NF | 1.0 M KOH  0.33 M urea | | 10 | 1.31 | | Appl. Catal. B Environ., 2020, 272,118959. | |
| NiMoxOy/NF | 1.0 M KOH  0.5 M urea | | 100 | 1.36 | | Applied Catalysis A, General, 2021 622, 118220 | |
| Ni2Fe(CN)6 | 1.0 M KOH  0.33 M urea | | 100 | 1.35 | | [Nature Energy](https://www.nature.com/nenergy), 2021, 6, 904–912 | |
| NiCoGe oxyhydroxide | 1.0 M KOH  0.33 M urea | | 100 | 1.33 | | Adv. Funct. Mater., 2023, 33, 2300687 | |
| Ni-TPA@NiSe/NF | 1.0 M KOH  0.5 M urea | | 100 | 1.37 | | ACS Catal. 2023, 13, 837−847 | |
| MnO2@NiCo-LDH | **1.0 M KOH**  **0.5 M urea** | | **10**  **100** | **1.262**  **1.326** | | **This work** | |
